# Supplementary material for: Assessment of Motor Abilities and Physical Fitness in Youth in the Context of Talent Identification—OSF Test
Source: MDPI journal article supplement (doi:10.3390/ijerph192114303), 2022-11-01
Supplement: s1 [file s1]

## Tables of normalised values

### Total

Table S1. Values for setting norms in general

|           | 3x10m run<br>- result | Standing<br>broad jump -<br>result | 1 kg medicine<br>ball throw -<br>result | 4-minute run<br>- result | Total   |
|-----------|-----------------------|------------------------------------|-----------------------------------------|--------------------------|---------|
| $\bar{x}$ | 8.538                 | 1.756                              | 7.131                                   | 814.443                  |         |
| SD        | 0.840                 | 0.287                              | 2.067                                   | 133.358                  |         |
| 0%        | -3.135                | -4.029                             | -2.918                                  | -4.908                   | -12.176 |
| 1%        | -1.948                | -2.217                             | -1.803                                  | -2.239                   | -7.308  |
| 2%        | -1.769                | -1.938                             | -1.610                                  | -1.942                   | -6.411  |
| 3%        | -1.663                | -1.764                             | -1.513                                  | -1.719                   | -5.820  |
| 4%        | -1.591                | -1.624                             | -1.416                                  | -1.570                   | -5.442  |
| 5%        | -1.473                | -1.590                             | -1.367                                  | -1.570                   | -5.140  |
| 6%        | -1.425                | -1.485                             | -1.270                                  | -1.422                   | -4.838  |
| 7%        | -1.354                | -1.415                             | -1.222                                  | -1.347                   | -4.588  |
| 8%        | -1.294                | -1.311                             | -1.173                                  | -1.273                   | -4.380  |
| 9%        | -1.235                | -1.241                             | -1.125                                  | -1.199                   | -4.177  |
| 10%       | -1.199                | -1.241                             | -1.125                                  | -1.199                   | -4.001  |
| 11%       | -1.116                | -1.241                             | -1.052                                  | -1.124                   | -3.815  |
| 12%       | -1.116                | -1.137                             | -1.028                                  | -1.124                   | -3.642  |
| 13%       | -1.057                | -1.067                             | -1.028                                  | -1.050                   | -3.510  |
| 14%       | -0.997                | -1.067                             | -0.979                                  | -0.976                   | -3.378  |
| 15%       | -0.986                | -0.962                             | -0.931                                  | -0.976                   | -3.230  |
| 16%       | -0.914                | -0.893                             | -0.931                                  | -0.901                   | -3.108  |
| 17%       | -0.879                | -0.893                             | -0.883                                  | -0.901                   | -2.986  |
| 18%       | -0.879                | -0.893                             | -0.858                                  | -0.827                   | -2.872  |
| 19%       | -0.831                | -0.893                             | -0.834                                  | -0.827                   | -2.750  |
| 20%       | -0.784                | -0.823                             | -0.786                                  | -0.790                   | -2.637  |
| 21%       | -0.760                | -0.788                             | -0.786                                  | -0.753                   | -2.521  |
| 22%       | -0.760                | -0.718                             | -0.786                                  | -0.678                   | -2.415  |
| 23%       | -0.736                | -0.718                             | -0.737                                  | -0.678                   | -2.317  |
| 24%       | -0.689                | -0.718                             | -0.689                                  | -0.678                   | -2.225  |
| 25%       | -0.653                | -0.649                             | -0.689                                  | -0.641                   | -2.125  |
| 26%       | -0.641                | -0.614                             | -0.640                                  | -0.604                   | -2.028  |
| 27%       | -0.641                | -0.544                             | -0.640                                  | -0.567                   | -1.937  |
| 28%       | -0.617                | -0.544                             | -0.592                                  | -0.530                   | -1.851  |
| 29%       | -0.582                | -0.544                             | -0.574                                  | -0.530                   | -1.759  |
| 30%       | -0.534                | -0.544                             | -0.543                                  | -0.455                   | -1.663  |
| 31%       | -0.522                | -0.544                             | -0.543                                  | -0.455                   | -1.573  |
| 32%       | -0.522                | -0.544                             | -0.543                                  | -0.455                   | -1.483  |

|           | 3x10m run<br>- result | Standing<br>broad jump -<br>result | 1 kg medicine<br>ball throw -<br>result | 4-minute run<br>- result | Total  |
|-----------|-----------------------|------------------------------------|-----------------------------------------|--------------------------|--------|
| $\bar{x}$ | 8.538                 | 1.756                              | 7.131                                   | 814.443                  |        |
| SD        | 0.840                 | 0.287                              | 2.067                                   | 133.358                  |        |
| 33%       | -0.499                | -0.474                             | -0.519                                  | -0.418                   | -1.386 |
| 34%       | -0.463                | -0.439                             | -0.495                                  | -0.381                   | -1.307 |
| 35%       | -0.427                | -0.370                             | -0.446                                  | -0.381                   | -1.219 |
| 36%       | -0.404                | -0.370                             | -0.446                                  | -0.322                   | -1.138 |
| 37%       | -0.404                | -0.370                             | -0.446                                  | -0.307                   | -1.060 |
| 38%       | -0.392                | -0.370                             | -0.398                                  | -0.232                   | -0.985 |
| 39%       | -0.368                | -0.300                             | -0.374                                  | -0.232                   | -0.907 |
| 40%       | -0.332                | -0.265                             | -0.349                                  | -0.232                   | -0.840 |
| 41%       | -0.285                | -0.230                             | -0.340                                  | -0.232                   | -0.764 |
| 42%       | -0.285                | -0.195                             | -0.301                                  | -0.195                   | -0.690 |
| 43%       | -0.285                | -0.195                             | -0.301                                  | -0.158                   | -0.609 |
| 44%       | -0.249                | -0.195                             | -0.277                                  | -0.158                   | -0.530 |
| 45%       | -0.214                | -0.195                             | -0.253                                  | -0.084                   | -0.448 |
| 46%       | -0.166                | -0.195                             | -0.214                                  | -0.084                   | -0.382 |
| 47%       | -0.166                | -0.161                             | -0.204                                  | -0.084                   | -0.310 |
| 48%       | -0.166                | -0.126                             | -0.156                                  | -0.084                   | -0.237 |
| 49%       | -0.130                | -0.056                             | -0.156                                  | -0.047                   | -0.161 |
| 50%       | -0.107                | -0.021                             | -0.131                                  | -0.009                   | -0.090 |
| 51%       | -0.047                | -0.021                             | -0.107                                  | -0.009                   | -0.013 |
| 52%       | -0.047                | -0.021                             | -0.059                                  | 0.028                    | 0.057  |
| 53%       | -0.047                | 0.014                              | -0.059                                  | 0.065                    | 0.136  |
| 54%       | -0.012                | 0.049                              | -0.059                                  | 0.065                    | 0.213  |
| 55%       | 0.024                 | 0.083                              | -0.059                                  | 0.080                    | 0.292  |
| 56%       | 0.072                 | 0.153                              | -0.010                                  | 0.139                    | 0.372  |
| 57%       | 0.072                 | 0.153                              | -0.010                                  | 0.139                    | 0.450  |
| 58%       | 0.083                 | 0.153                              | 0.038                                   | 0.214                    | 0.531  |
| 59%       | 0.131                 | 0.153                              | 0.038                                   | 0.214                    | 0.610  |
| 60%       | 0.167                 | 0.153                              | 0.087                                   | 0.214                    | 0.687  |
| 61%       | 0.190                 | 0.153                              | 0.111                                   | 0.214                    | 0.768  |
| 62%       | 0.190                 | 0.188                              | 0.135                                   | 0.288                    | 0.853  |
| 63%       | 0.226                 | 0.223                              | 0.184                                   | 0.288                    | 0.928  |
| 64%       | 0.273                 | 0.293                              | 0.184                                   | 0.288                    | 1.019  |
| 65%       | 0.309                 | 0.327                              | 0.232                                   | 0.325                    | 1.099  |
| 66%       | 0.309                 | 0.327                              | 0.232                                   | 0.362                    | 1.192  |
| 67%       | 0.321                 | 0.327                              | 0.281                                   | 0.362                    | 1.276  |
| 68%       | 0.368                 | 0.397                              | 0.329                                   | 0.437                    | 1.358  |
| 69%       | 0.428                 | 0.432                              | 0.329                                   | 0.437                    | 1.450  |
| 70%       | 0.428                 | 0.502                              | 0.377                                   | 0.496                    | 1.549  |

|             | <b>3x10m run<br/>- result</b> | <b>Standing<br/>broad jump -<br/>result</b> | <b>1 kg medicine<br/>ball throw -<br/>result</b> | <b>4-minute run<br/>- result</b> | <b>Total</b> |
|-------------|-------------------------------|---------------------------------------------|--------------------------------------------------|----------------------------------|--------------|
| $\bar{x}$   | 8.538                         | 1.756                                       | 7.131                                            | 814.443                          |              |
| <b>SD</b>   | 0.840                         | 0.287                                       | 2.067                                            | 133.358                          |              |
| <b>71%</b>  | 0.428                         | 0.502                                       | 0.426                                            | 0.511                            |              |
| <b>72%</b>  | 0.487                         | 0.502                                       | 0.426                                            | 0.511                            | 1.637        |
| <b>73%</b>  | 0.547                         | 0.502                                       | 0.426                                            | 0.585                            | 1.726        |
| <b>74%</b>  | 0.547                         | 0.502                                       | 0.474                                            | 0.585                            | 1.826        |
| <b>75%</b>  | 0.547                         | 0.571                                       | 0.523                                            | 0.660                            | 1.924        |
| <b>76%</b>  | 0.606                         | 0.641                                       | 0.547                                            | 0.660                            | 2.024        |
| <b>77%</b>  | 0.665                         | 0.676                                       | 0.620                                            | 0.660                            | 2.119        |
| <b>78%</b>  | 0.665                         | 0.711                                       | 0.668                                            | 0.660                            | 2.226        |
| <b>79%</b>  | 0.689                         | 0.780                                       | 0.668                                            | 0.734                            | 2.341        |
| <b>80%</b>  | 0.744                         | 0.815                                       | 0.717                                            | 0.793                            | 2.465        |
| <b>81%</b>  | 0.784                         | 0.850                                       | 0.789                                            | 0.808                            | 2.579        |
| <b>82%</b>  | 0.808                         | 0.850                                       | 0.838                                            | 0.883                            | 2.704        |
| <b>83%</b>  | 0.879                         | 0.850                                       | 0.896                                            | 0.920                            | 2.833        |
| <b>84%</b>  | 0.903                         | 0.920                                       | 0.911                                            | 0.957                            | 3.003        |
| <b>85%</b>  | 0.962                         | 0.990                                       | 0.959                                            | 1.031                            | 3.136        |
| <b>86%</b>  | 1.022                         | 1.024                                       | 1.007                                            | 1.031                            | 3.288        |
| <b>87%</b>  | 1.069                         | 1.129                                       | 1.104                                            | 1.106                            | 3.435        |
| <b>88%</b>  | 1.140                         | 1.199                                       | 1.153                                            | 1.173                            | 3.594        |
| <b>89%</b>  | 1.200                         | 1.199                                       | 1.250                                            | 1.254                            | 3.793        |
| <b>90%</b>  | 1.259                         | 1.268                                       | 1.347                                            | 1.284                            | 4.000        |
| <b>91%</b>  | 1.378                         | 1.373                                       | 1.395                                            | 1.361                            | 4.196        |
| <b>92%</b>  | 1.497                         | 1.478                                       | 1.444                                            | 1.403                            | 4.407        |
| <b>93%</b>  | 1.568                         | 1.547                                       | 1.589                                            | 1.477                            | 4.660        |
| <b>94%</b>  | 1.651                         | 1.617                                       | 1.686                                            | 1.589                            | 4.942        |
| <b>95%</b>  | 1.734                         | 1.727                                       | 1.880                                            | 1.775                            | 5.251        |
| <b>96%</b>  | 1.877                         | 1.896                                       | 2.049                                            | 1.849                            | 5.644        |
| <b>97%</b>  | 2.067                         | 2.070                                       | 2.364                                            | 2.146                            | 6.104        |
| <b>98%</b>  | 2.328                         | 2.244                                       | 2.607                                            | 2.295                            | 6.619        |
| <b>99%</b>  | 2.835                         | 2.628                                       | 3.188                                            | 2.667                            | 7.380        |
| <b>100%</b> | 8.979                         | 4.684                                       | 5.272                                            | 4.005                            | 8.618        |
|             |                               |                                             |                                                  |                                  | 14.612       |

## Girls

Table S2. Values for setting norms for girls

|           | 3x10m run<br>- result | Standing broad<br>jump - result | 1 kg medicine<br>ball throw -<br>result | 4-minute run<br>- result | Total   |
|-----------|-----------------------|---------------------------------|-----------------------------------------|--------------------------|---------|
| $\bar{x}$ | 8.653                 | 1.712                           | 6.793                                   | 794.003                  |         |
| SD        | 0.821                 | 0.257                           | 1.814                                   | 123.486                  |         |
| 0%        | -3.081                | -4.311                          | -3.136                                  | -5.167                   | -12.303 |
| 1%        | -1.951                | -2.373                          | -1.922                                  | -2.350                   | -7.493  |
| 2%        | -1.769                | -2.022                          | -1.702                                  | -1.986                   | -6.612  |
| 3%        | -1.647                | -1.985                          | -1.591                                  | -1.784                   | -5.971  |
| 4%        | -1.526                | -1.791                          | -1.536                                  | -1.623                   | -5.565  |
| 5%        | -1.453                | -1.598                          | -1.426                                  | -1.542                   | -5.210  |
| 6%        | -1.404                | -1.598                          | -1.371                                  | -1.502                   | -4.970  |
| 7%        | -1.293                | -1.481                          | -1.316                                  | -1.381                   | -4.721  |
| 8%        | -1.282                | -1.404                          | -1.260                                  | -1.300                   | -4.470  |
| 9%        | -1.185                | -1.326                          | -1.205                                  | -1.219                   | -4.262  |
| 10%       | -1.161                | -1.210                          | -1.150                                  | -1.179                   | -4.100  |
| 11%       | -1.100                | -1.210                          | -1.095                                  | -1.139                   | -3.892  |
| 12%       | -1.039                | -1.210                          | -1.040                                  | -1.098                   | -3.713  |
| 13%       | -1.039                | -1.171                          | -0.985                                  | -1.058                   | -3.548  |
| 14%       | -1.003                | -1.055                          | -0.985                                  | -1.026                   | -3.379  |
| 15%       | -0.942                | -1.016                          | -0.985                                  | -0.977                   | -3.250  |
| 16%       | -0.918                | -1.016                          | -0.929                                  | -0.896                   | -3.129  |
| 17%       | -0.918                | -0.939                          | -0.929                                  | -0.896                   | -2.991  |
| 18%       | -0.869                | -0.861                          | -0.874                                  | -0.856                   | -2.873  |
| 19%       | -0.821                | -0.822                          | -0.874                                  | -0.816                   | -2.749  |
| 20%       | -0.796                | -0.822                          | -0.819                                  | -0.775                   | -2.638  |
| 21%       | -0.796                | -0.822                          | -0.819                                  | -0.735                   | -2.524  |
| 22%       | -0.784                | -0.822                          | -0.764                                  | -0.735                   | -2.408  |
| 23%       | -0.736                | -0.745                          | -0.764                                  | -0.695                   | -2.302  |
| 24%       | -0.687                | -0.706                          | -0.709                                  | -0.654                   | -2.187  |
| 25%       | -0.675                | -0.629                          | -0.709                                  | -0.573                   | -2.087  |
| 26%       | -0.675                | -0.629                          | -0.654                                  | -0.573                   | -1.983  |
| 27%       | -0.651                | -0.629                          | -0.654                                  | -0.573                   | -1.898  |
| 28%       | -0.614                | -0.590                          | -0.598                                  | -0.573                   | -1.803  |
| 29%       | -0.578                | -0.512                          | -0.598                                  | -0.533                   | -1.698  |
| 30%       | -0.553                | -0.474                          | -0.543                                  | -0.493                   | -1.602  |
| 31%       | -0.553                | -0.435                          | -0.543                                  | -0.452                   | -1.510  |
| 32%       | -0.541                | -0.435                          | -0.516                                  | -0.412                   | -1.423  |
| 33%       | -0.517                | -0.435                          | -0.488                                  | -0.412                   | -1.336  |
| 34%       | -0.480                | -0.435                          | -0.433                                  | -0.331                   | -1.251  |
| 35%       | -0.432                | -0.435                          | -0.433                                  | -0.331                   | -1.150  |
| 36%       | -0.432                | -0.396                          | -0.433                                  | -0.331                   | -1.060  |

|           | 3x10m run<br>- result | Standing broad<br>jump - result | 1 kg medicine<br>ball throw -<br>result | 4-minute run<br>- result | Total  |
|-----------|-----------------------|---------------------------------|-----------------------------------------|--------------------------|--------|
| $\bar{x}$ | 8.653                 | 1.712                           | 6.793                                   | 794.003                  |        |
| SD        | 0.821                 | 0.257                           | 1.814                                   | 123.486                  |        |
| 37%       | -0.432                | -0.357                          | -0.433                                  | -0.331                   | -0.966 |
| 38%       | -0.408                | -0.318                          | -0.378                                  | -0.251                   | -0.878 |
| 39%       | -0.371                | -0.241                          | -0.378                                  | -0.251                   | -0.804 |
| 40%       | -0.322                | -0.241                          | -0.323                                  | -0.251                   | -0.713 |
| 41%       | -0.310                | -0.241                          | -0.323                                  | -0.194                   | -0.636 |
| 42%       | -0.310                | -0.241                          | -0.323                                  | -0.170                   | -0.556 |
| 43%       | -0.286                | -0.163                          | -0.268                                  | -0.129                   | -0.477 |
| 44%       | -0.250                | -0.125                          | -0.268                                  | -0.089                   | -0.407 |
| 45%       | -0.213                | -0.086                          | -0.212                                  | -0.089                   | -0.327 |
| 46%       | -0.189                | -0.047                          | -0.212                                  | -0.089                   | -0.255 |
| 47%       | -0.189                | -0.047                          | -0.157                                  | -0.081                   | -0.183 |
| 48%       | -0.177                | -0.047                          | -0.157                                  | -0.008                   | -0.112 |
| 49%       | -0.140                | -0.047                          | -0.157                                  | -0.008                   | -0.020 |
| 50%       | -0.104                | -0.047                          | -0.102                                  | 0.032                    | 0.063  |
| 51%       | -0.067                | -0.008                          | -0.102                                  | 0.072                    | 0.156  |
| 52%       | -0.067                | 0.030                           | -0.047                                  | 0.072                    | 0.226  |
| 53%       | -0.043                | 0.069                           | -0.047                                  | 0.072                    | 0.303  |
| 54%       | -0.007                | 0.108                           | 0.008                                   | 0.072                    | 0.381  |
| 55%       | 0.030                 | 0.147                           | 0.008                                   | 0.113                    | 0.450  |
| 56%       | 0.054                 | 0.147                           | 0.063                                   | 0.153                    | 0.542  |
| 57%       | 0.054                 | 0.147                           | 0.063                                   | 0.153                    | 0.613  |
| 58%       | 0.091                 | 0.185                           | 0.119                                   | 0.153                    | 0.687  |
| 59%       | 0.127                 | 0.263                           | 0.119                                   | 0.234                    | 0.765  |
| 60%       | 0.176                 | 0.302                           | 0.119                                   | 0.234                    | 0.858  |
| 61%       | 0.176                 | 0.340                           | 0.119                                   | 0.234                    | 0.948  |
| 62%       | 0.176                 | 0.340                           | 0.174                                   | 0.274                    | 1.032  |
| 63%       | 0.224                 | 0.340                           | 0.174                                   | 0.315                    | 1.111  |
| 64%       | 0.273                 | 0.340                           | 0.229                                   | 0.355                    | 1.199  |
| 65%       | 0.297                 | 0.340                           | 0.229                                   | 0.395                    | 1.291  |
| 66%       | 0.297                 | 0.340                           | 0.284                                   | 0.395                    | 1.366  |
| 67%       | 0.309                 | 0.418                           | 0.312                                   | 0.395                    | 1.449  |
| 68%       | 0.370                 | 0.457                           | 0.339                                   | 0.420                    | 1.538  |
| 69%       | 0.419                 | 0.496                           | 0.394                                   | 0.476                    | 1.619  |
| 70%       | 0.419                 | 0.534                           | 0.394                                   | 0.476                    | 1.715  |
| 71%       | 0.419                 | 0.534                           | 0.450                                   | 0.476                    | 1.796  |
| 72%       | 0.461                 | 0.573                           | 0.450                                   | 0.541                    | 1.902  |
| 73%       | 0.516                 | 0.612                           | 0.505                                   | 0.557                    | 2.005  |
| 74%       | 0.540                 | 0.651                           | 0.560                                   | 0.597                    | 2.090  |
| 75%       | 0.540                 | 0.728                           | 0.560                                   | 0.638                    | 2.189  |

|           | 3x10m run<br>- result | Standing broad<br>jump - result | 1 kg medicine<br>ball throw -<br>result | 4-minute run<br>- result | Total  |
|-----------|-----------------------|---------------------------------|-----------------------------------------|--------------------------|--------|
| $\bar{x}$ | 8.653                 | 1.712                           | 6.793                                   | 794.003                  |        |
| SD        | 0.821                 | 0.257                           | 1.814                                   | 123.486                  |        |
| 76%       | 0.577                 | 0.728                           | 0.615                                   | 0.678                    | 2.309  |
| 77%       | 0.638                 | 0.728                           | 0.670                                   | 0.718                    | 2.402  |
| 78%       | 0.662                 | 0.728                           | 0.670                                   | 0.718                    | 2.497  |
| 79%       | 0.686                 | 0.728                           | 0.670                                   | 0.799                    | 2.597  |
| 80%       | 0.747                 | 0.806                           | 0.753                                   | 0.799                    | 2.700  |
| 81%       | 0.783                 | 0.883                           | 0.781                                   | 0.880                    | 2.820  |
| 82%       | 0.820                 | 0.922                           | 0.836                                   | 0.880                    | 2.928  |
| 83%       | 0.893                 | 0.922                           | 0.891                                   | 0.880                    | 3.031  |
| 84%       | 0.905                 | 0.999                           | 0.946                                   | 0.920                    | 3.153  |
| 85%       | 0.978                 | 1.077                           | 1.001                                   | 0.960                    | 3.283  |
| 86%       | 1.026                 | 1.116                           | 1.056                                   | 1.041                    | 3.412  |
| 87%       | 1.087                 | 1.116                           | 1.111                                   | 1.082                    | 3.561  |
| 88%       | 1.148                 | 1.116                           | 1.222                                   | 1.162                    | 3.720  |
| 89%       | 1.245                 | 1.193                           | 1.222                                   | 1.203                    | 3.903  |
| 90%       | 1.306                 | 1.271                           | 1.277                                   | 1.283                    | 4.048  |
| 91%       | 1.391                 | 1.310                           | 1.387                                   | 1.364                    | 4.215  |
| 92%       | 1.500                 | 1.426                           | 1.498                                   | 1.405                    | 4.401  |
| 93%       | 1.573                 | 1.503                           | 1.608                                   | 1.526                    | 4.612  |
| 94%       | 1.634                 | 1.503                           | 1.718                                   | 1.606                    | 4.910  |
| 95%       | 1.756                 | 1.620                           | 1.773                                   | 1.687                    | 5.178  |
| 96%       | 1.877                 | 1.697                           | 1.939                                   | 1.768                    | 5.465  |
| 97%       | 2.096                 | 1.891                           | 2.215                                   | 2.010                    | 5.887  |
| 98%       | 2.363                 | 2.046                           | 2.435                                   | 2.292                    | 6.430  |
| 99%       | 2.849                 | 2.279                           | 2.877                                   | 2.680                    | 7.358  |
| 100%      | 7.589                 | 4.217                           | 4.586                                   | 4.109                    | 11.112 |

## Boys

Table S3. Values for setting norms for boys

|           | 3x10m run<br>- result | Standing broad<br>jump - result | 1 kg medicine<br>ball throw -<br>result | 4-minute run<br>- result | Total   |
|-----------|-----------------------|---------------------------------|-----------------------------------------|--------------------------|---------|
| $\bar{x}$ | 8.375                 | 1.817                           | 7.604                                   | 843.027                  |         |
| SD        | 0.836                 | 0.313                           | 2.293                                   | 141.127                  |         |
| 0%        | -2.955                | -3.258                          | -2.532                                  | -4.122                   | -12.189 |
| 1%        | -1.881                | -2.041                          | -1.745                                  | -2.234                   | -7.371  |

|           | 3x10m run<br>- result | Standing broad<br>jump - result | 1 kg medicine<br>ball throw -<br>result | 4-minute run<br>- result | Total  |
|-----------|-----------------------|---------------------------------|-----------------------------------------|--------------------------|--------|
| $\bar{x}$ | 8.375                 | 1.817                           | 7.604                                   | 843.027                  |        |
| SD        | 0.836                 | 0.313                           | 2.293                                   | 141.127                  |        |
| 2%        | -1.738                | -1.849                          | -1.570                                  | -1.955                   | -6.291 |
| 3%        | -1.643                | -1.657                          | -1.460                                  | -1.675                   | -5.802 |
| 4%        | -1.523                | -1.657                          | -1.351                                  | -1.653                   | -5.356 |
| 5%        | -1.500                | -1.497                          | -1.307                                  | -1.535                   | -5.015 |
| 6%        | -1.404                | -1.401                          | -1.264                                  | -1.465                   | -4.765 |
| 7%        | -1.368                | -1.337                          | -1.220                                  | -1.360                   | -4.553 |
| 8%        | -1.285                | -1.337                          | -1.176                                  | -1.325                   | -4.320 |
| 9%        | -1.261                | -1.273                          | -1.132                                  | -1.255                   | -4.126 |
| 10%       | -1.165                | -1.177                          | -1.132                                  | -1.185                   | -3.986 |
| 11%       | -1.165                | -1.177                          | -1.089                                  | -1.116                   | -3.790 |
| 12%       | -1.118                | -1.081                          | -1.045                                  | -1.116                   | -3.658 |
| 13%       | -1.058                | -1.017                          | -1.001                                  | -1.046                   | -3.498 |
| 14%       | -1.046                | -1.017                          | -0.958                                  | -0.976                   | -3.355 |
| 15%       | -1.020                | -1.017                          | -0.958                                  | -0.976                   | -3.224 |
| 16%       | -0.939                | -0.953                          | -0.914                                  | -0.941                   | -3.118 |
| 17%       | -0.927                | -0.921                          | -0.892                                  | -0.884                   | -2.973 |
| 18%       | -0.915                | -0.856                          | -0.870                                  | -0.836                   | -2.873 |
| 19%       | -0.855                | -0.856                          | -0.826                                  | -0.836                   | -2.763 |
| 20%       | -0.807                | -0.824                          | -0.783                                  | -0.801                   | -2.653 |
| 21%       | -0.807                | -0.760                          | -0.783                                  | -0.766                   | -2.564 |
| 22%       | -0.760                | -0.696                          | -0.739                                  | -0.703                   | -2.464 |
| 23%       | -0.712                | -0.696                          | -0.695                                  | -0.696                   | -2.357 |
| 24%       | -0.688                | -0.696                          | -0.695                                  | -0.626                   | -2.259 |
| 25%       | -0.688                | -0.696                          | -0.695                                  | -0.626                   | -2.164 |
| 26%       | -0.640                | -0.696                          | -0.695                                  | -0.626                   | -2.061 |
| 27%       | -0.605                | -0.664                          | -0.651                                  | -0.556                   | -1.957 |
| 28%       | -0.569                | -0.632                          | -0.608                                  | -0.556                   | -1.864 |
| 29%       | -0.569                | -0.568                          | -0.608                                  | -0.486                   | -1.784 |
| 30%       | -0.569                | -0.536                          | -0.608                                  | -0.486                   | -1.712 |
| 31%       | -0.533                | -0.536                          | -0.564                                  | -0.416                   | -1.629 |
| 32%       | -0.485                | -0.536                          | -0.520                                  | -0.416                   | -1.543 |
| 33%       | -0.449                | -0.504                          | -0.520                                  | -0.416                   | -1.454 |
| 34%       | -0.449                | -0.440                          | -0.476                                  | -0.381                   | -1.383 |
| 35%       | -0.449                | -0.408                          | -0.476                                  | -0.346                   | -1.318 |
| 36%       | -0.426                | -0.376                          | -0.476                                  | -0.346                   | -1.247 |
| 37%       | -0.390                | -0.376                          | -0.433                                  | -0.304                   | -1.162 |
| 38%       | -0.342                | -0.376                          | -0.433                                  | -0.276                   | -1.105 |
| 39%       | -0.330                | -0.376                          | -0.389                                  | -0.276                   | -1.030 |
| 40%       | -0.330                | -0.376                          | -0.345                                  | -0.276                   | -0.953 |

|           | 3x10m run<br>- result | Standing broad<br>jump - result | 1 kg medicine<br>ball throw -<br>result | 4-minute run<br>- result | Total  |
|-----------|-----------------------|---------------------------------|-----------------------------------------|--------------------------|--------|
| $\bar{x}$ | 8.375                 | 1.817                           | 7.604                                   | 843.027                  |        |
| SD        | 0.836                 | 0.313                           | 2.293                                   | 141.127                  |        |
| 41%       | -0.318                | -0.344                          | -0.345                                  | -0.241                   | -0.896 |
| 42%       | -0.282                | -0.312                          | -0.323                                  | -0.207                   | -0.817 |
| 43%       | -0.247                | -0.248                          | -0.301                                  | -0.207                   | -0.735 |
| 44%       | -0.211                | -0.216                          | -0.258                                  | -0.137                   | -0.661 |
| 45%       | -0.211                | -0.216                          | -0.258                                  | -0.137                   | -0.597 |
| 46%       | -0.211                | -0.216                          | -0.258                                  | -0.116                   | -0.530 |
| 47%       | -0.187                | -0.184                          | -0.258                                  | -0.067                   | -0.454 |
| 48%       | -0.151                | -0.120                          | -0.214                                  | -0.067                   | -0.366 |
| 49%       | -0.103                | -0.120                          | -0.170                                  | 0.003                    | -0.293 |
| 50%       | -0.092                | -0.056                          | -0.170                                  | 0.003                    | -0.215 |
| 51%       | -0.092                | -0.056                          | -0.148                                  | 0.003                    | -0.124 |
| 52%       | -0.056                | -0.056                          | -0.126                                  | 0.017                    | -0.052 |
| 53%       | -0.020                | -0.056                          | -0.083                                  | 0.073                    | 0.023  |
| 54%       | 0.028                 | -0.056                          | -0.083                                  | 0.073                    | 0.105  |
| 55%       | 0.028                 | -0.056                          | -0.039                                  | 0.073                    | 0.188  |
| 56%       | 0.040                 | 0.008                           | -0.039                                  | 0.143                    | 0.256  |
| 57%       | 0.064                 | 0.040                           | 0.005                                   | 0.143                    | 0.332  |
| 58%       | 0.099                 | 0.104                           | 0.040                                   | 0.178                    | 0.424  |
| 59%       | 0.147                 | 0.104                           | 0.070                                   | 0.213                    | 0.510  |
| 60%       | 0.147                 | 0.104                           | 0.092                                   | 0.213                    | 0.581  |
| 61%       | 0.159                 | 0.168                           | 0.097                                   | 0.276                    | 0.658  |
| 62%       | 0.195                 | 0.200                           | 0.136                                   | 0.283                    | 0.752  |
| 63%       | 0.243                 | 0.264                           | 0.180                                   | 0.283                    | 0.823  |
| 64%       | 0.266                 | 0.264                           | 0.180                                   | 0.353                    | 0.919  |
| 65%       | 0.266                 | 0.264                           | 0.180                                   | 0.353                    | 1.022  |
| 66%       | 0.290                 | 0.264                           | 0.223                                   | 0.388                    | 1.116  |
| 67%       | 0.338                 | 0.264                           | 0.267                                   | 0.423                    | 1.200  |
| 68%       | 0.386                 | 0.328                           | 0.267                                   | 0.423                    | 1.305  |
| 69%       | 0.386                 | 0.392                           | 0.311                                   | 0.423                    | 1.418  |
| 70%       | 0.410                 | 0.424                           | 0.355                                   | 0.428                    | 1.531  |
| 71%       | 0.469                 | 0.456                           | 0.398                                   | 0.493                    | 1.629  |
| 72%       | 0.505                 | 0.520                           | 0.420                                   | 0.528                    | 1.731  |
| 73%       | 0.505                 | 0.552                           | 0.442                                   | 0.563                    | 1.835  |
| 74%       | 0.529                 | 0.584                           | 0.530                                   | 0.582                    | 1.989  |
| 75%       | 0.589                 | 0.584                           | 0.552                                   | 0.633                    | 2.115  |
| 76%       | 0.624                 | 0.584                           | 0.573                                   | 0.668                    | 2.227  |
| 77%       | 0.624                 | 0.648                           | 0.617                                   | 0.703                    | 2.361  |
| 78%       | 0.696                 | 0.712                           | 0.617                                   | 0.772                    | 2.487  |
| 79%       | 0.744                 | 0.744                           | 0.661                                   | 0.772                    | 2.601  |

|             | <b>3x10m run<br/>- result</b> | <b>Standing broad<br/>jump - result</b> | <b>1 kg medicine<br/>ball throw -<br/>result</b> | <b>4-minute run<br/>- result</b> | <b>Total</b> |
|-------------|-------------------------------|-----------------------------------------|--------------------------------------------------|----------------------------------|--------------|
| $\bar{x}$   | 8.375                         | 1.817                                   | 7.604                                            | 843.027                          |              |
| <b>SD</b>   | 0.836                         | 0.313                                   | 2.293                                            | 141.127                          |              |
| <b>80%</b>  | 0.744                         | 0.840                                   | 0.705                                            | 0.807                            | 2.753        |
| <b>81%</b>  | 0.780                         | 0.904                                   | 0.792                                            | 0.842                            | 2.914        |
| <b>82%</b>  | 0.863                         | 0.904                                   | 0.836                                            | 0.874                            | 3.046        |
| <b>83%</b>  | 0.863                         | 0.936                                   | 0.880                                            | 0.912                            | 3.183        |
| <b>84%</b>  | 0.911                         | 1.033                                   | 0.967                                            | 0.982                            | 3.336        |
| <b>85%</b>  | 0.982                         | 1.065                                   | 1.011                                            | 1.023                            | 3.494        |
| <b>86%</b>  | 0.994                         | 1.161                                   | 1.055                                            | 1.052                            | 3.665        |
| <b>87%</b>  | 1.054                         | 1.225                                   | 1.098                                            | 1.122                            | 3.820        |
| <b>88%</b>  | 1.102                         | 1.225                                   | 1.164                                            | 1.122                            | 4.033        |
| <b>89%</b>  | 1.185                         | 1.317                                   | 1.272                                            | 1.220                            | 4.237        |
| <b>90%</b>  | 1.233                         | 1.385                                   | 1.317                                            | 1.262                            | 4.471        |
| <b>91%</b>  | 1.340                         | 1.545                                   | 1.448                                            | 1.332                            | 4.691        |
| <b>92%</b>  | 1.412                         | 1.545                                   | 1.492                                            | 1.472                            | 4.958        |
| <b>93%</b>  | 1.519                         | 1.641                                   | 1.623                                            | 1.472                            | 5.205        |
| <b>94%</b>  | 1.651                         | 1.767                                   | 1.798                                            | 1.681                            | 5.476        |
| <b>95%</b>  | 1.805                         | 1.865                                   | 1.929                                            | 1.821                            | 5.833        |
| <b>96%</b>  | 1.913                         | 1.929                                   | 2.148                                            | 1.821                            | 6.240        |
| <b>97%</b>  | 2.056                         | 2.121                                   | 2.367                                            | 2.031                            | 6.719        |
| <b>98%</b>  | 2.295                         | 2.281                                   | 2.717                                            | 2.241                            | 7.382        |
| <b>99%</b>  | 2.892                         | 2.505                                   | 3.242                                            | 2.590                            | 8.197        |
| <b>100%</b> | 9.216                         | 4.106                                   | 4.554                                            | 3.569                            | 12.839       |
